# Supplementary material for: UBE2S interacting with TRIM21 mediates the K11-linked ubiquitination of LPP to promote the lymphatic metastasis of bladder cancer
Source: PubMed Central journal article supplement (PMC10329682; doi:10.1038/s41419-023-05938-2), 2023-07-08

Figure 2A

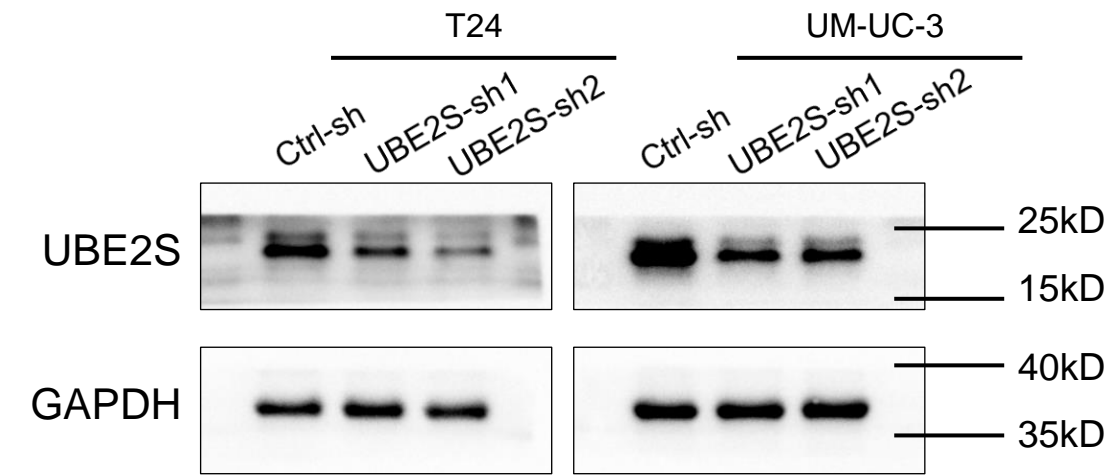

Figure 3A

Left

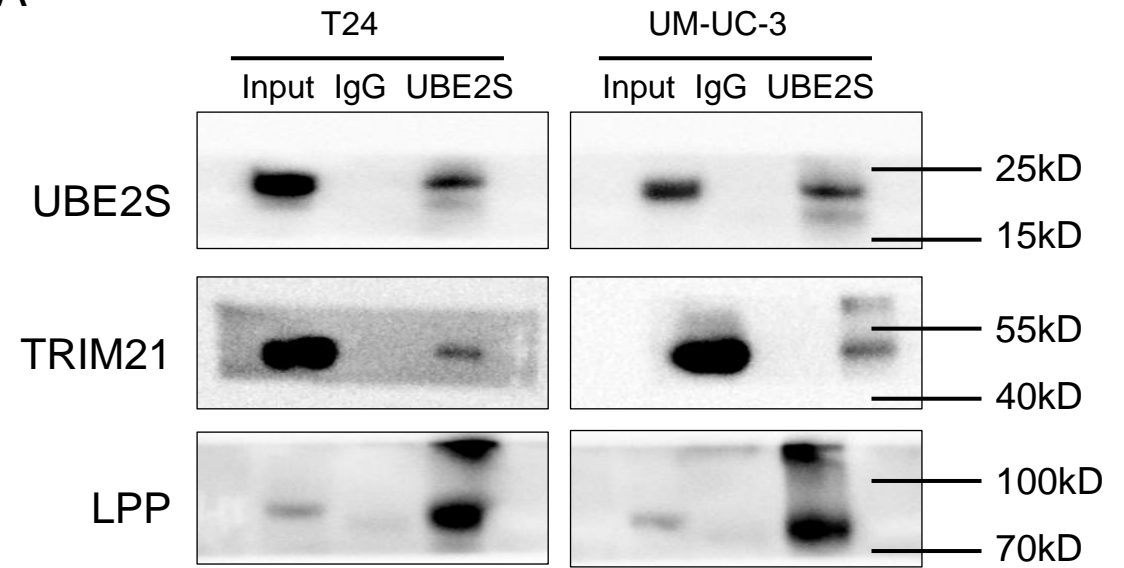

Figure 3A

Middle

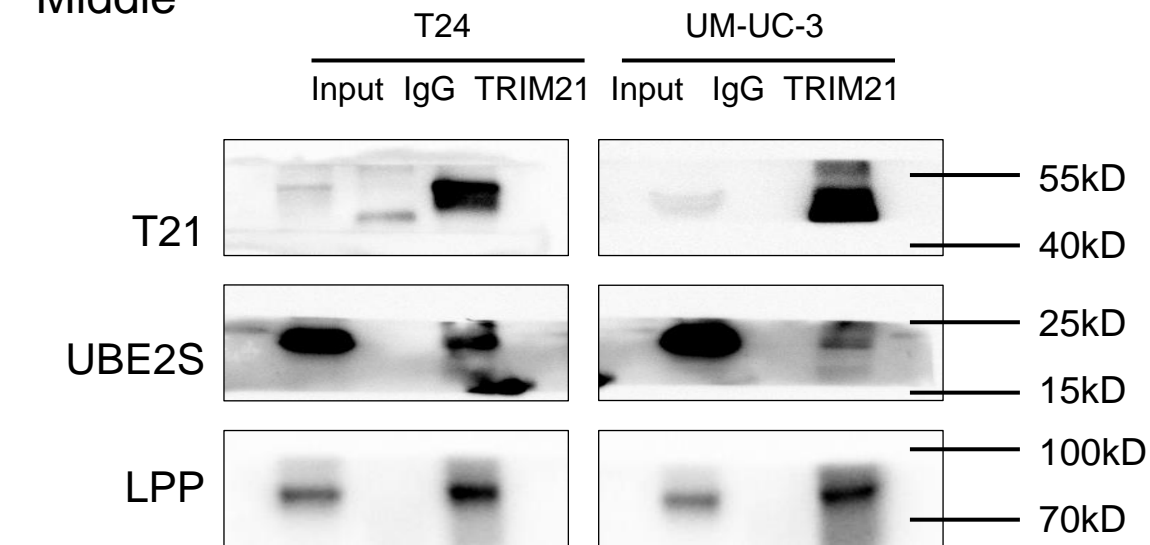

Figure 3A

Right

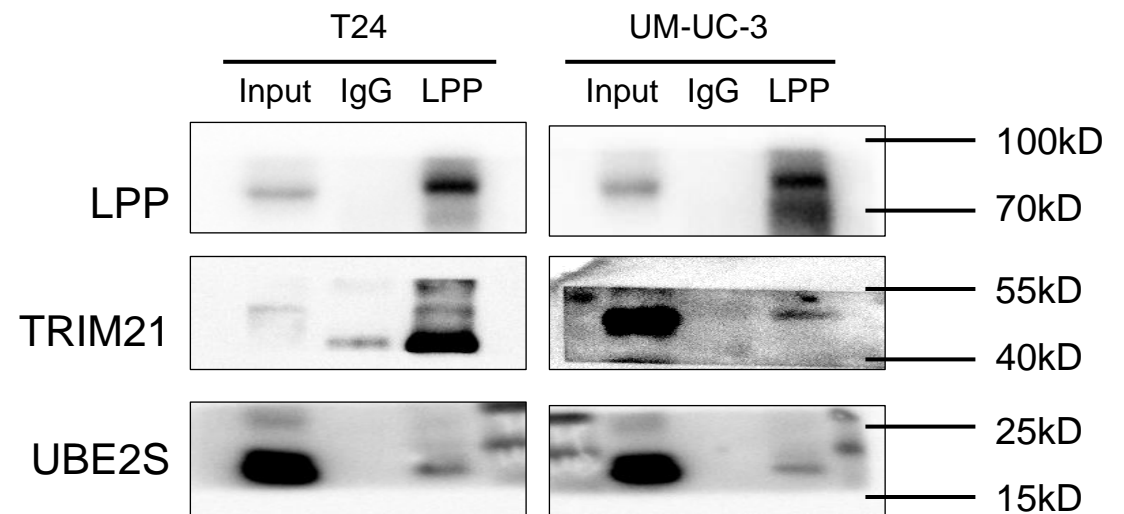

Figure 3C

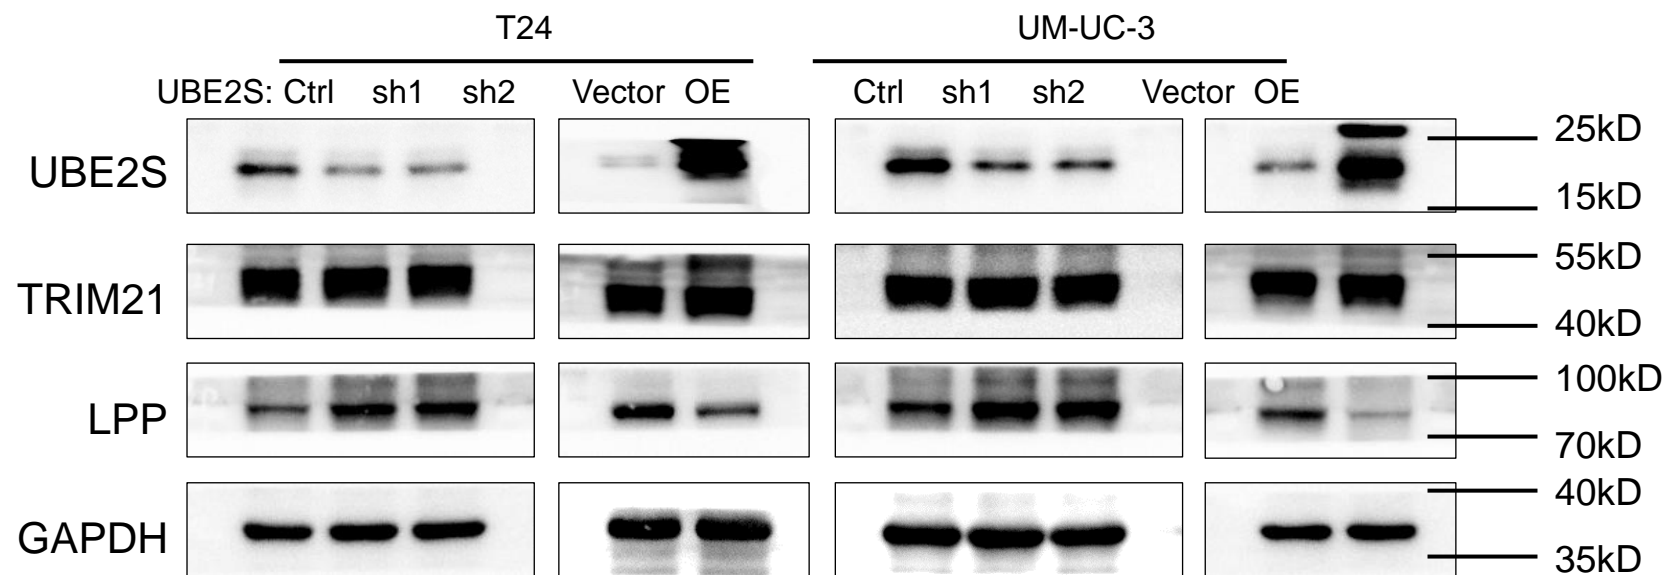

Figure 3D

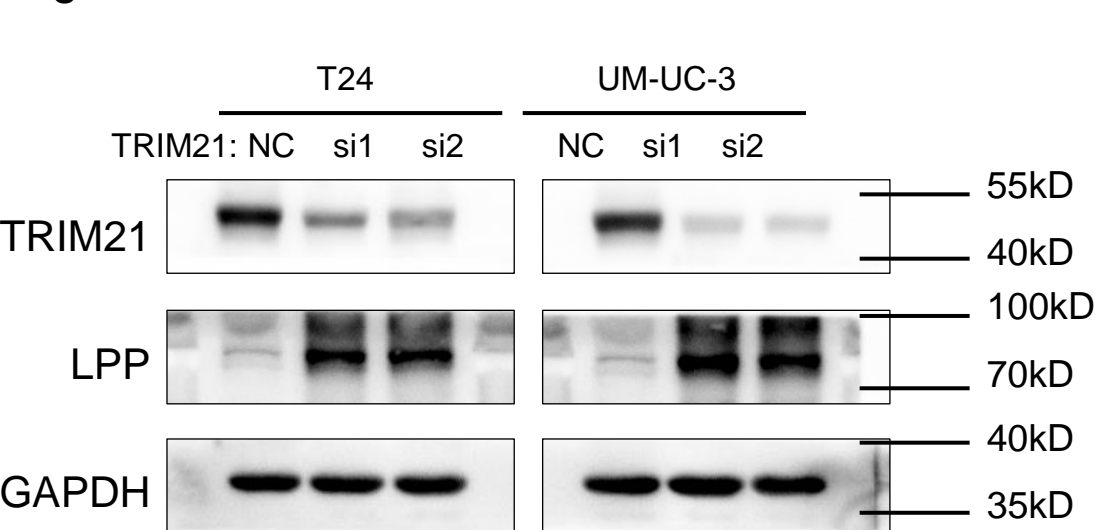

Figure 4A

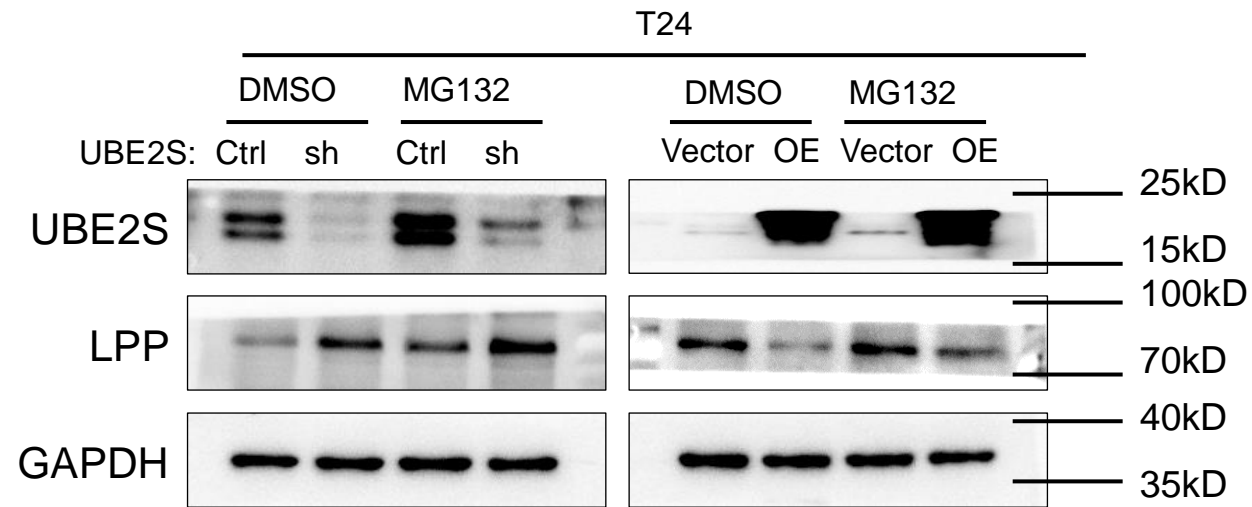

Figure 4B

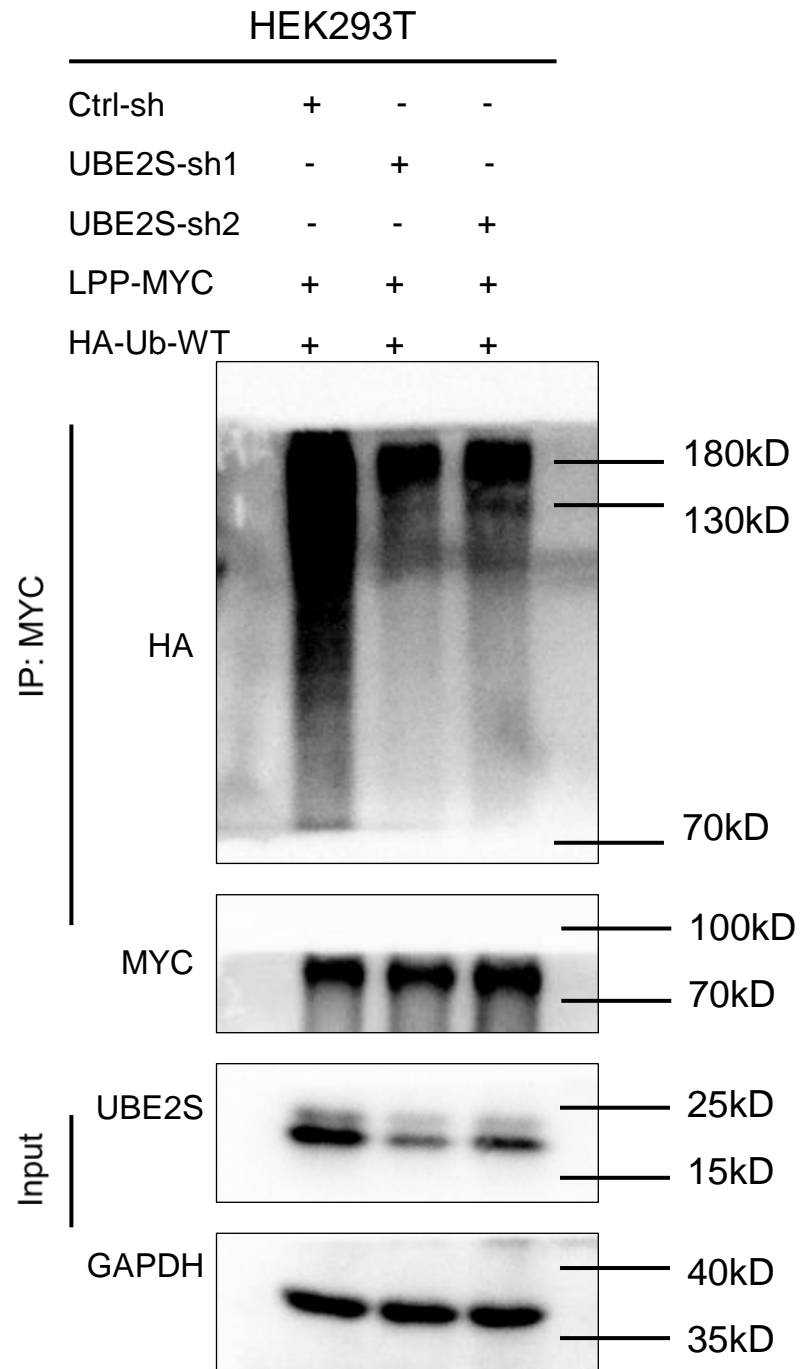

Figure 4C

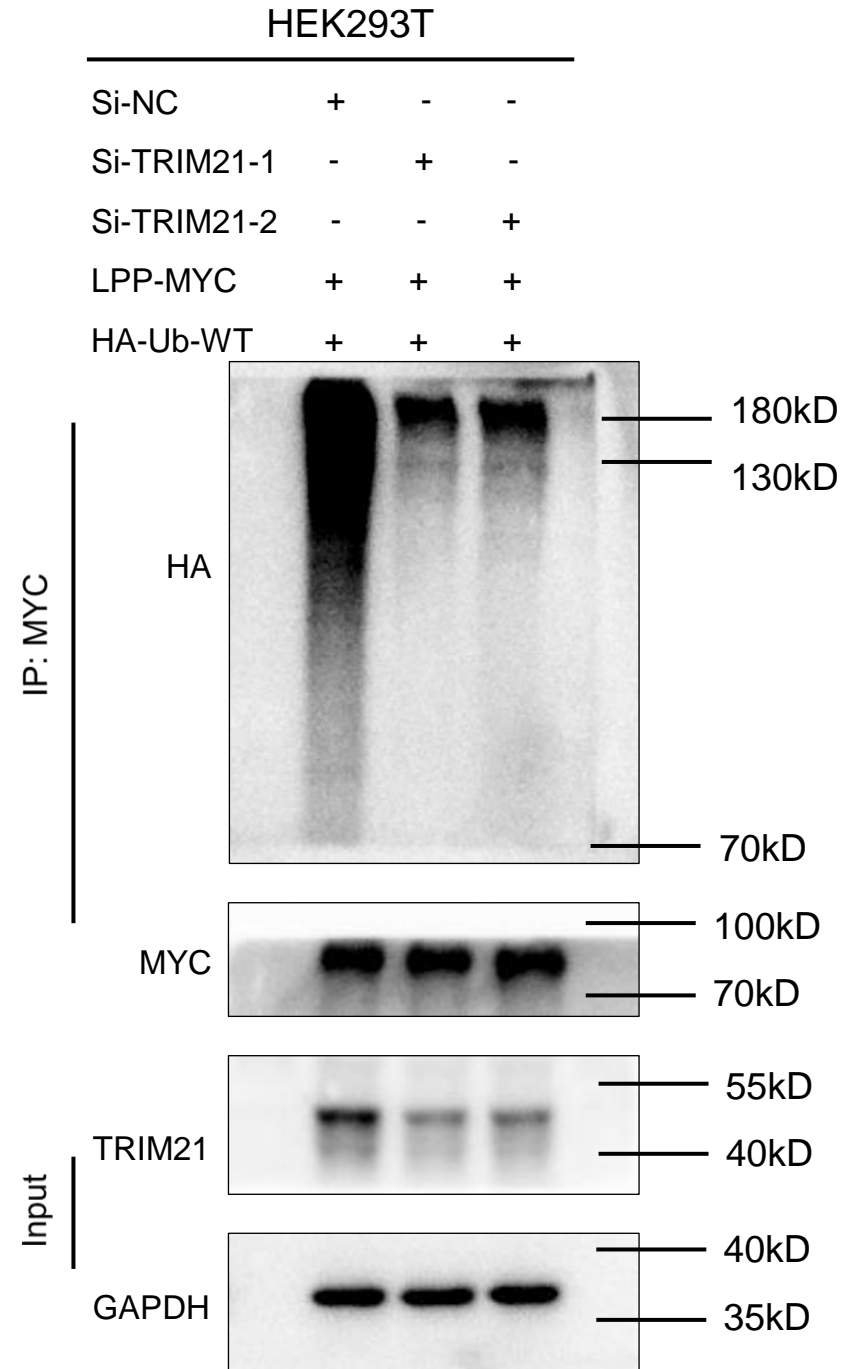

Figure 4D

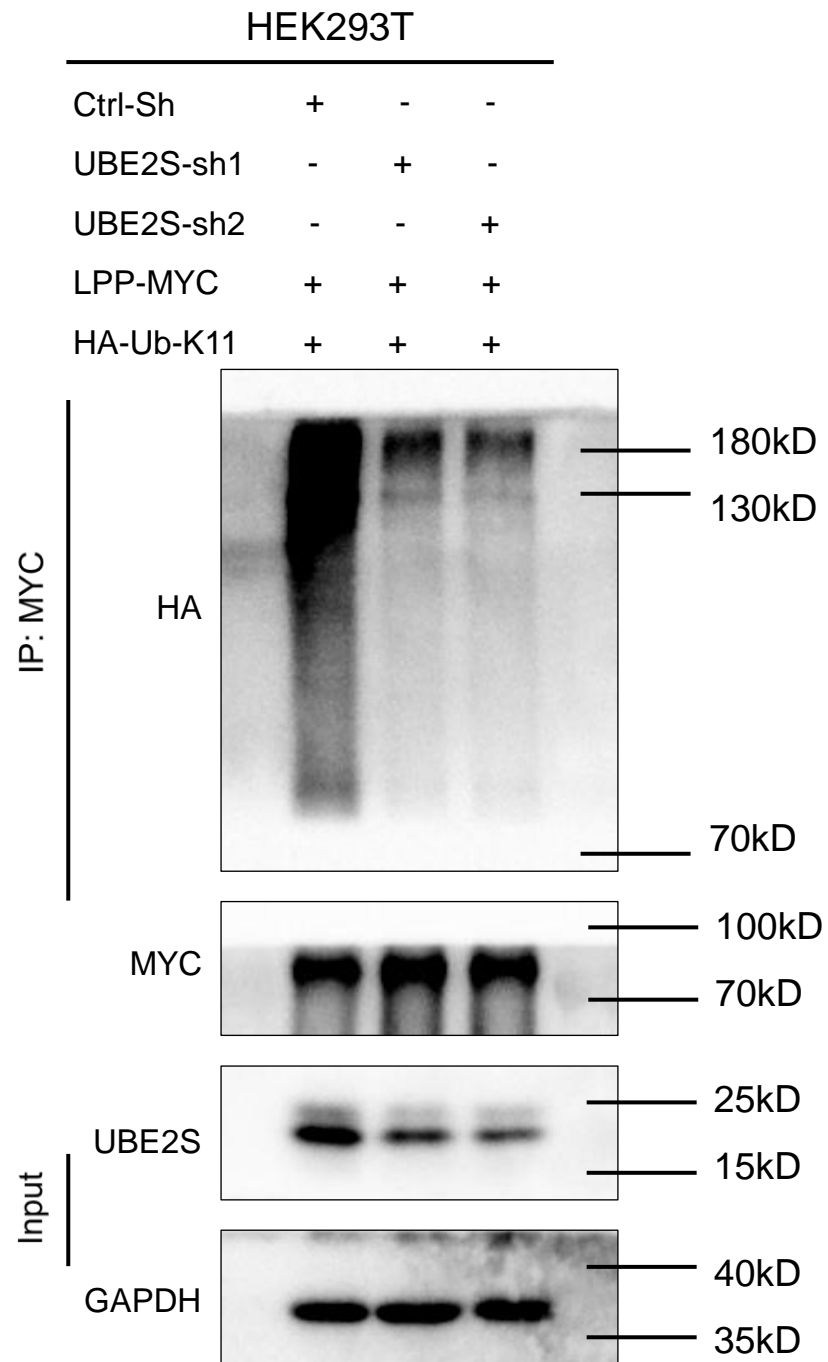

Figure 4E

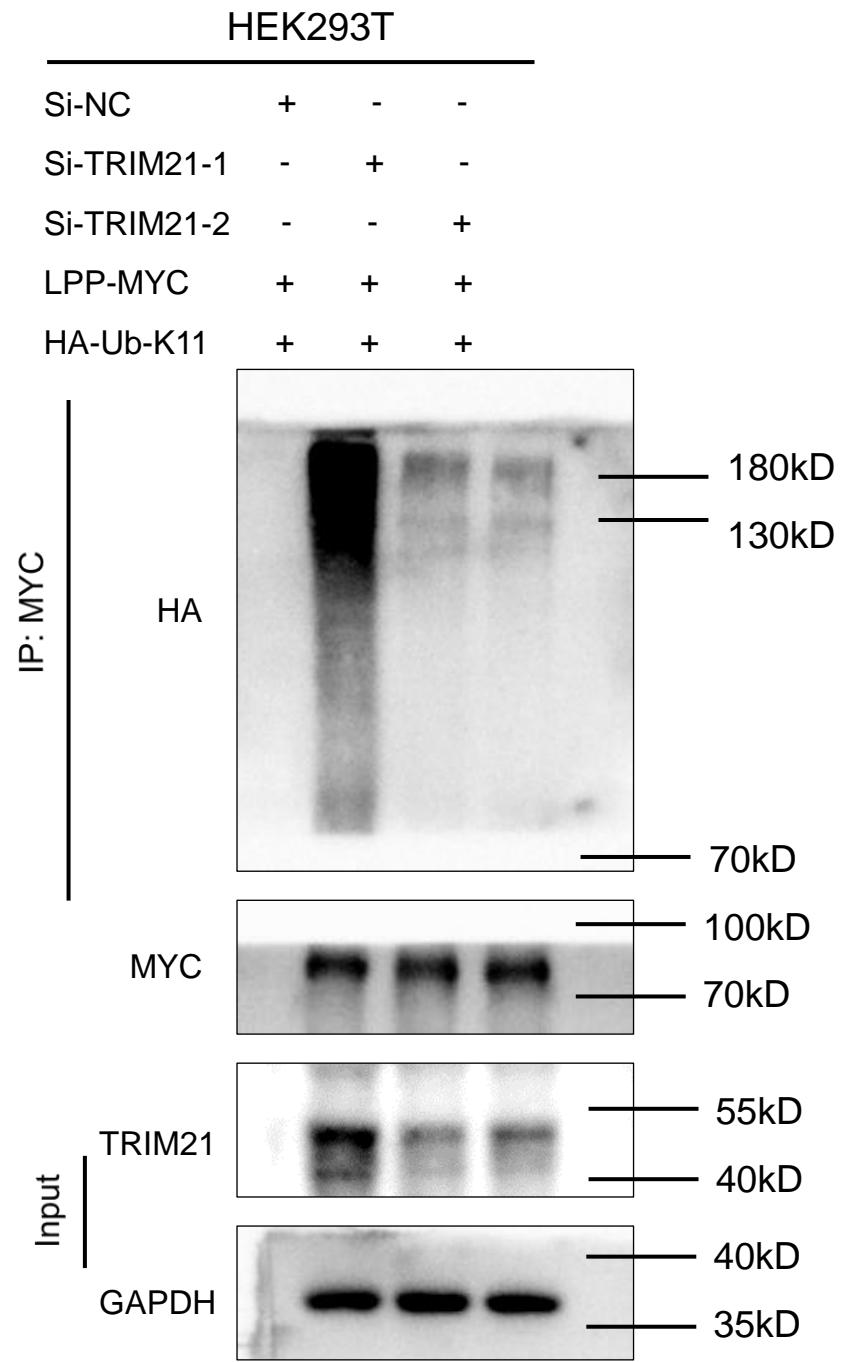

Figure 4F

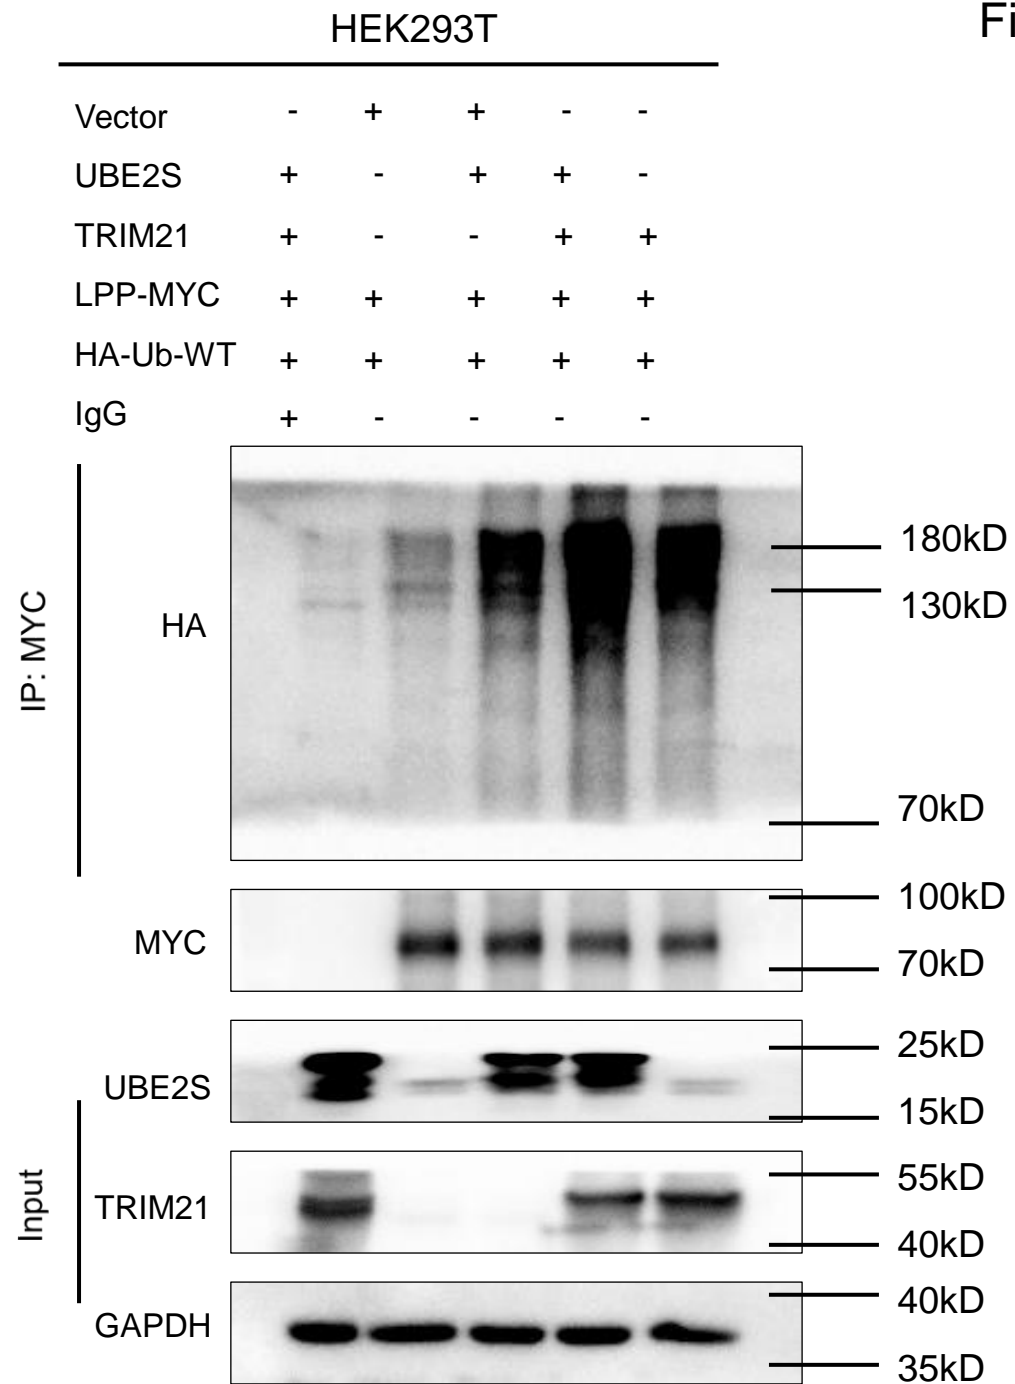

Figure 4G

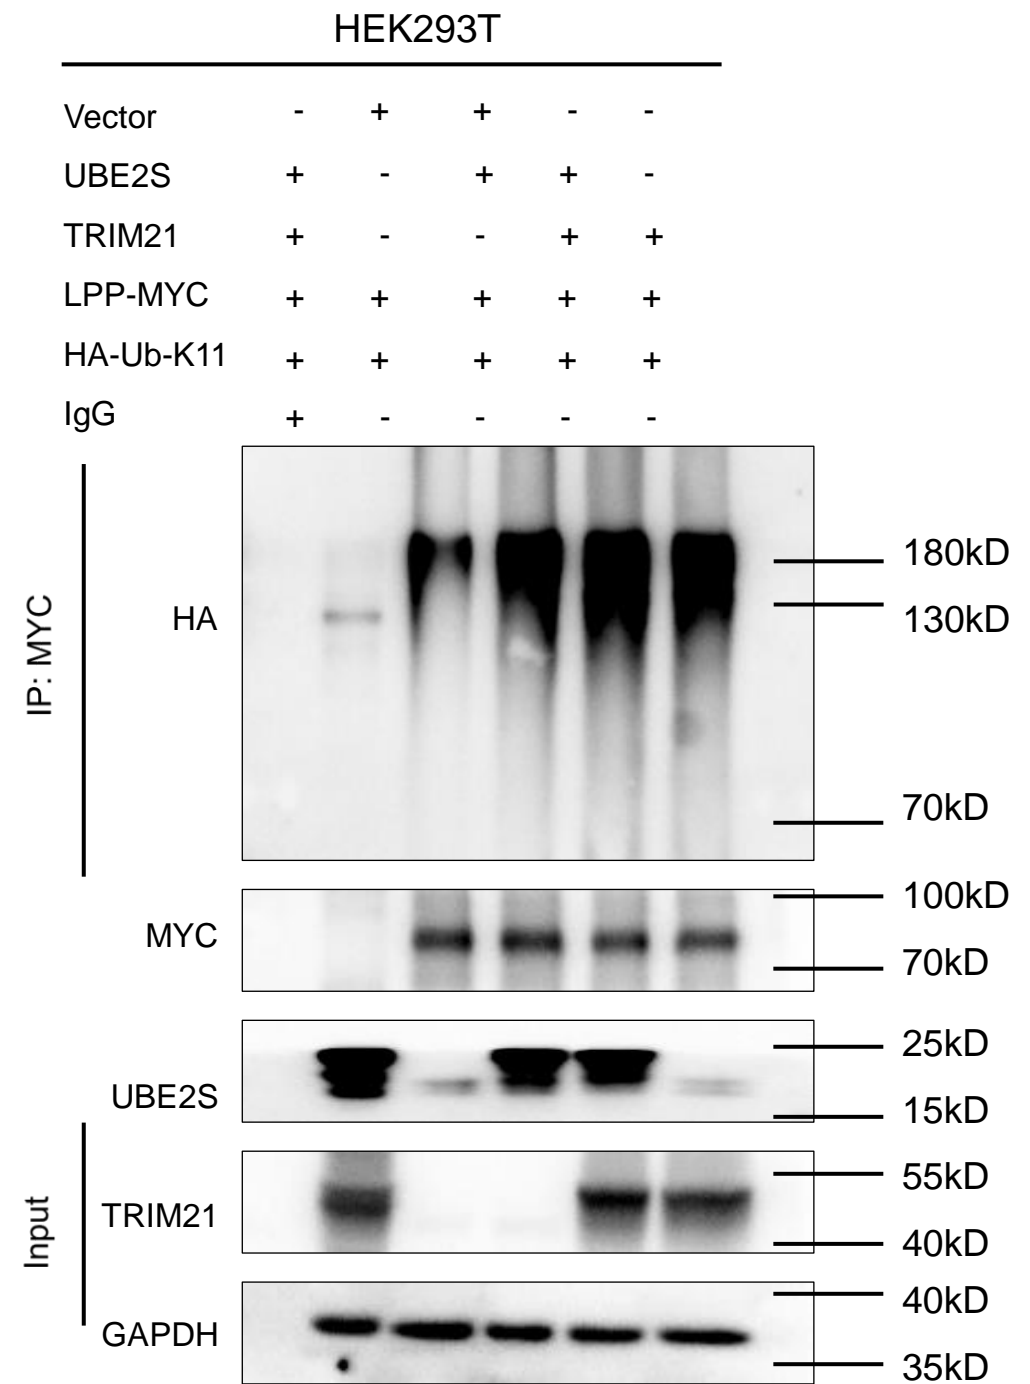

Figure 4H

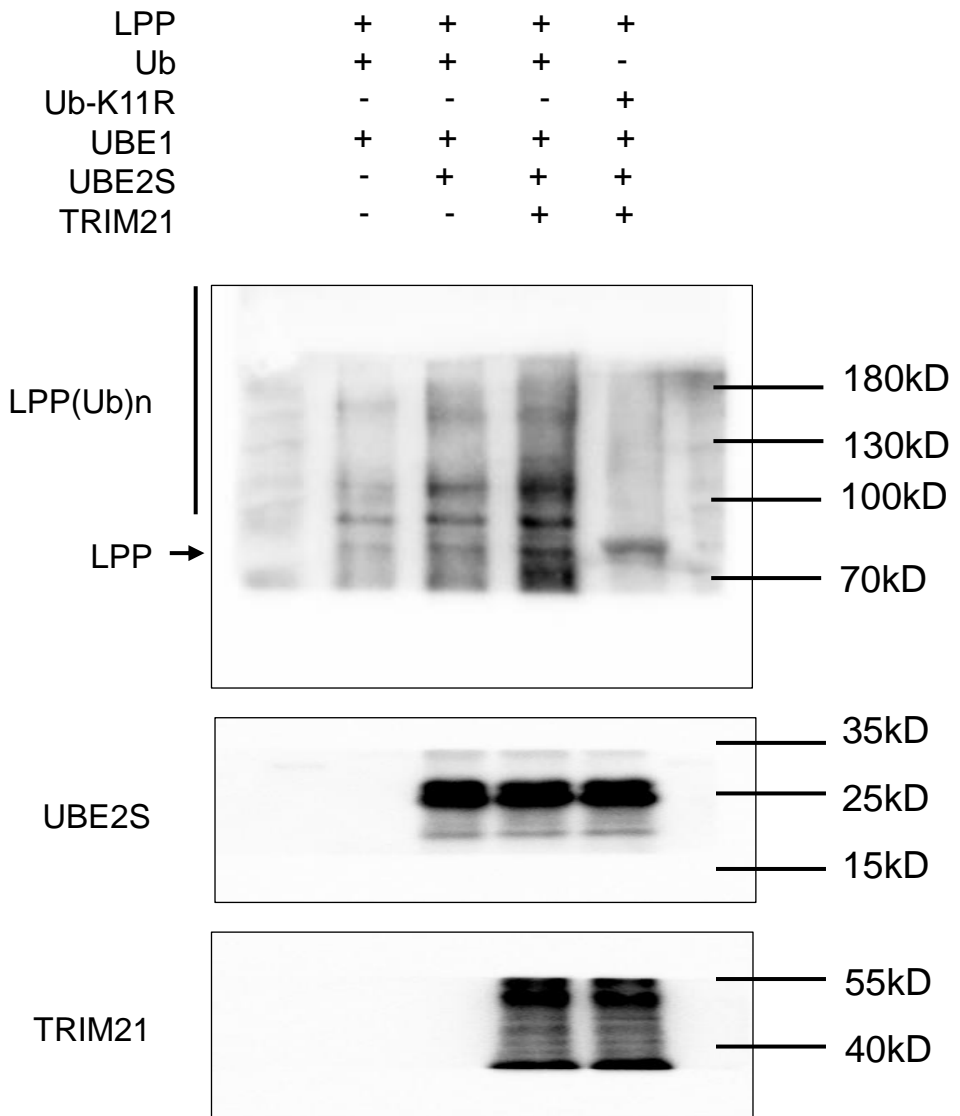

Figure 4J

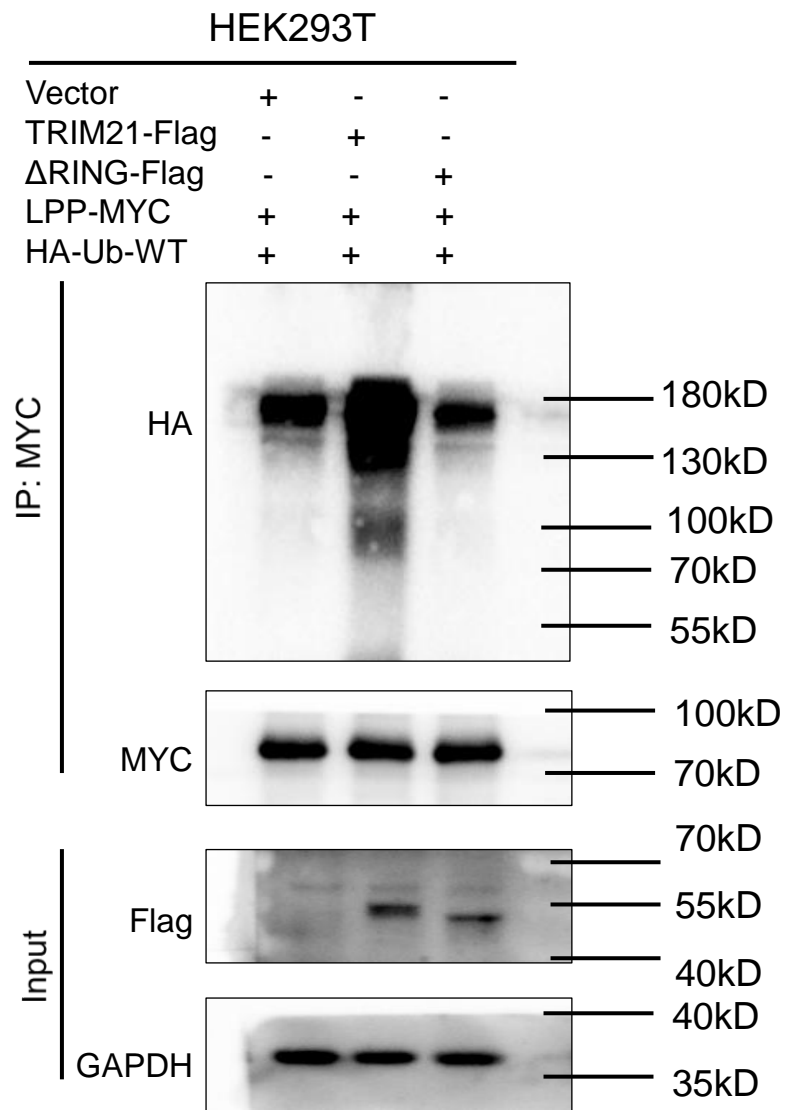

Figure 4K

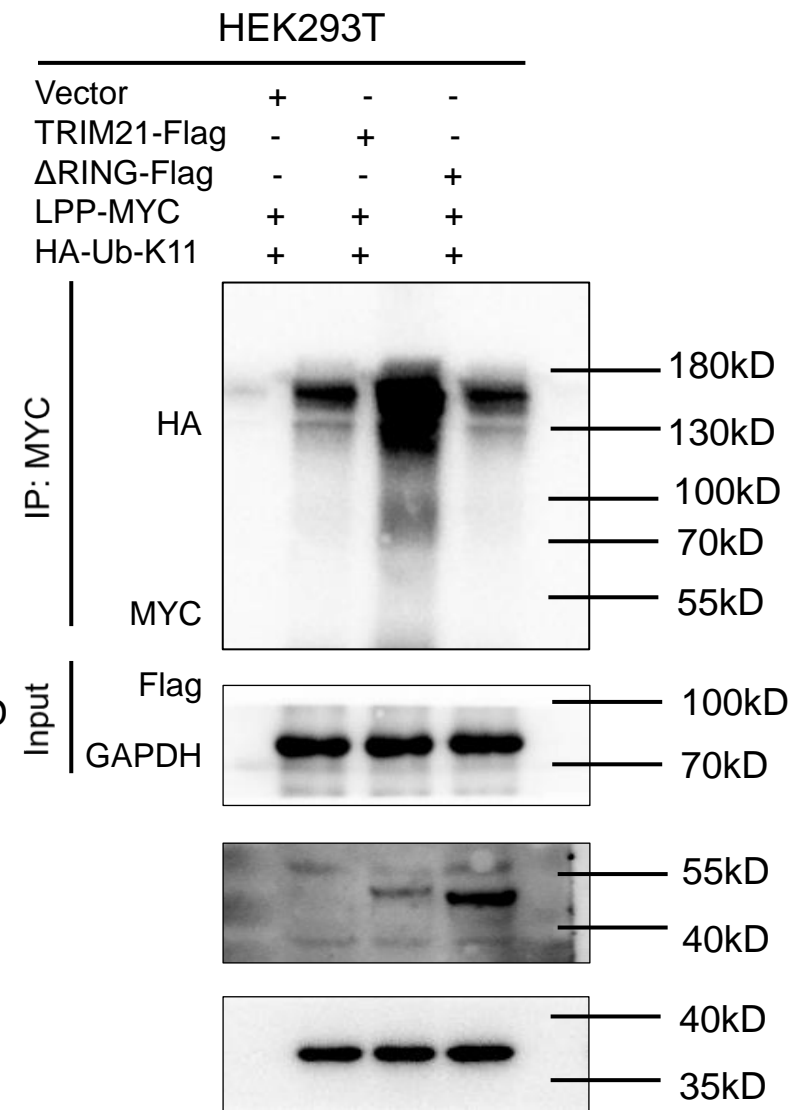







Figure 7A

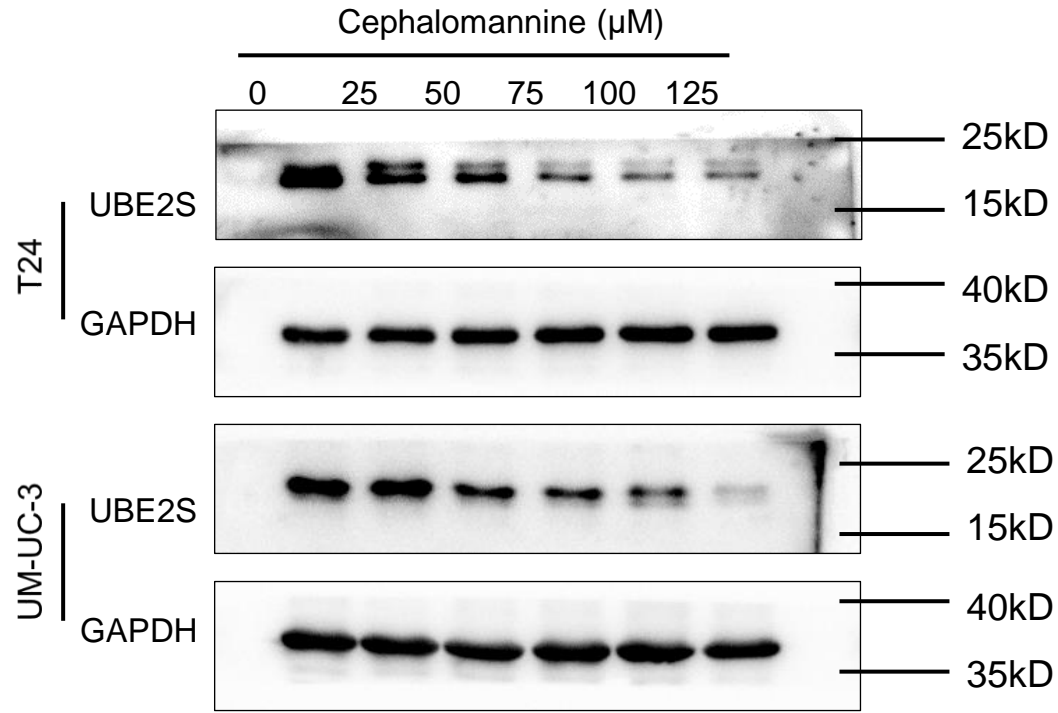

Figure S2

**A**

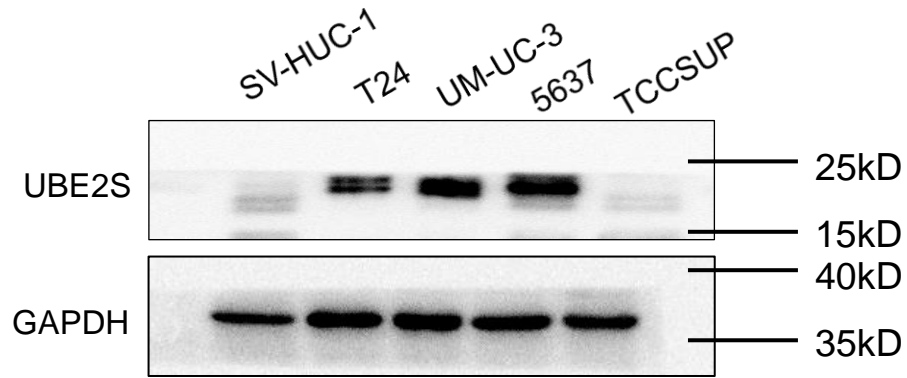

**B**

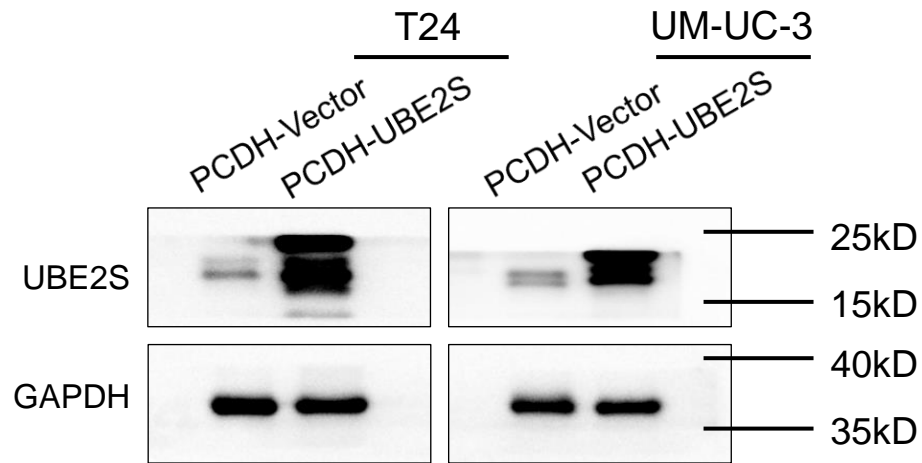

Figure S5

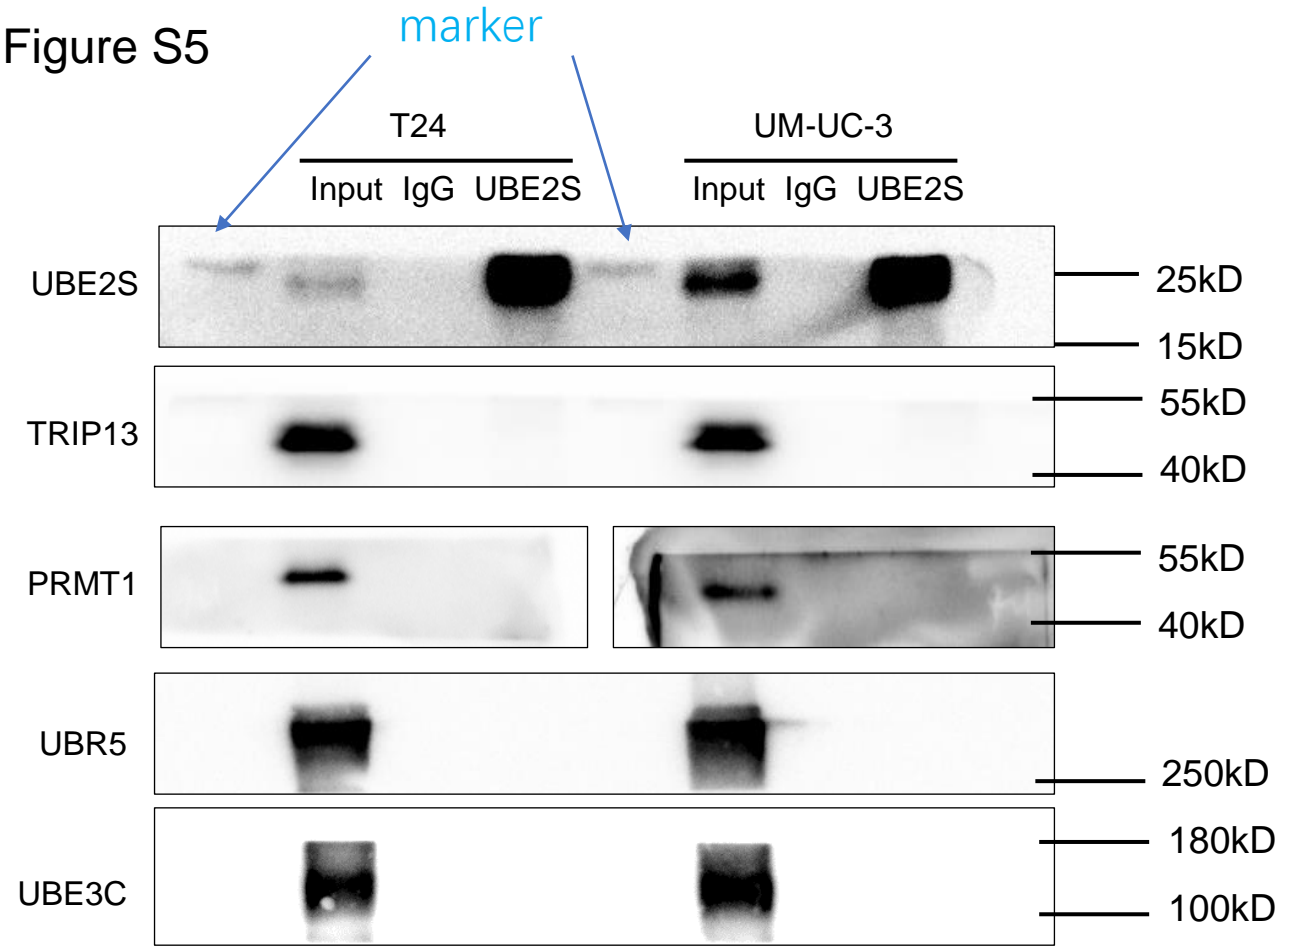

Figure S7A

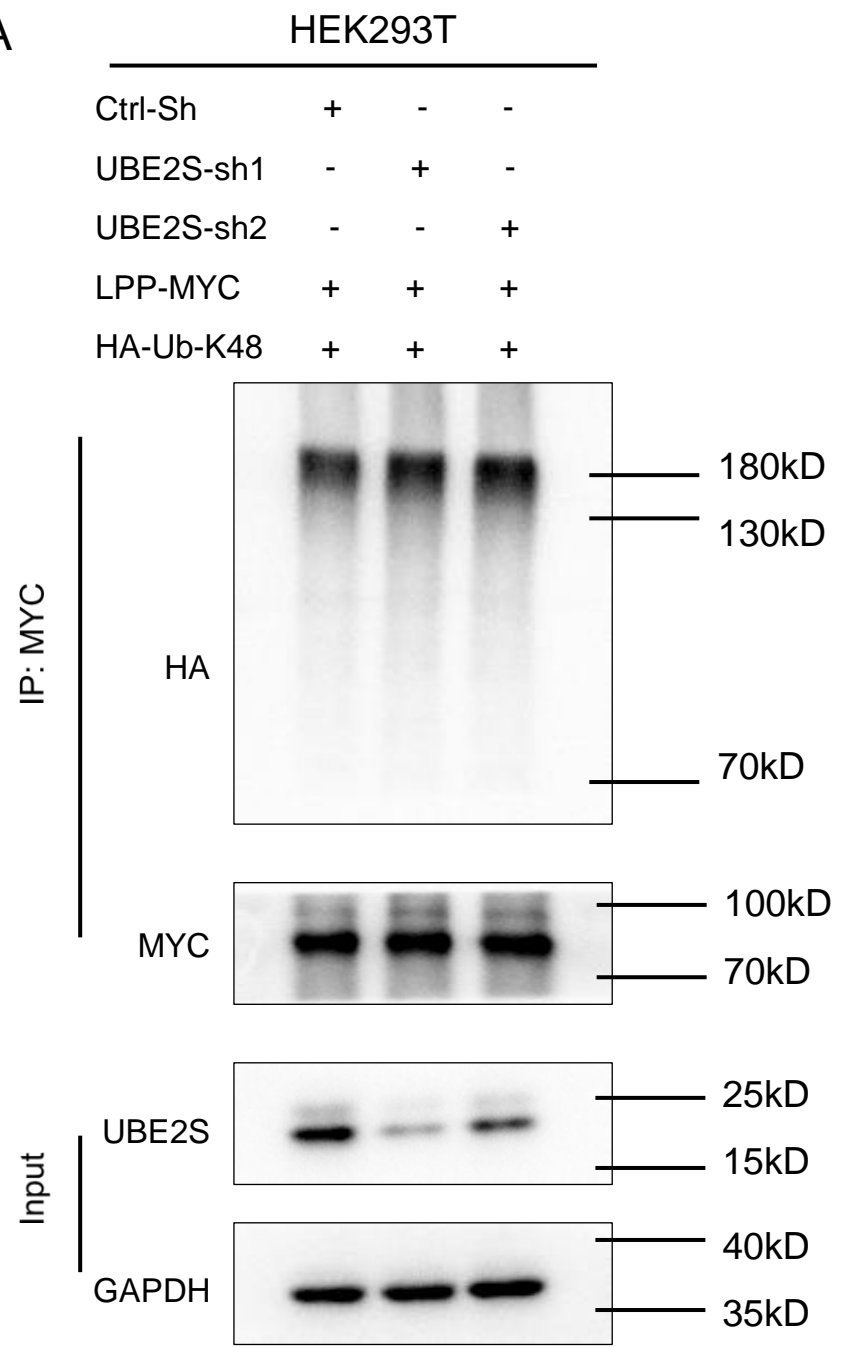

Figure S7B

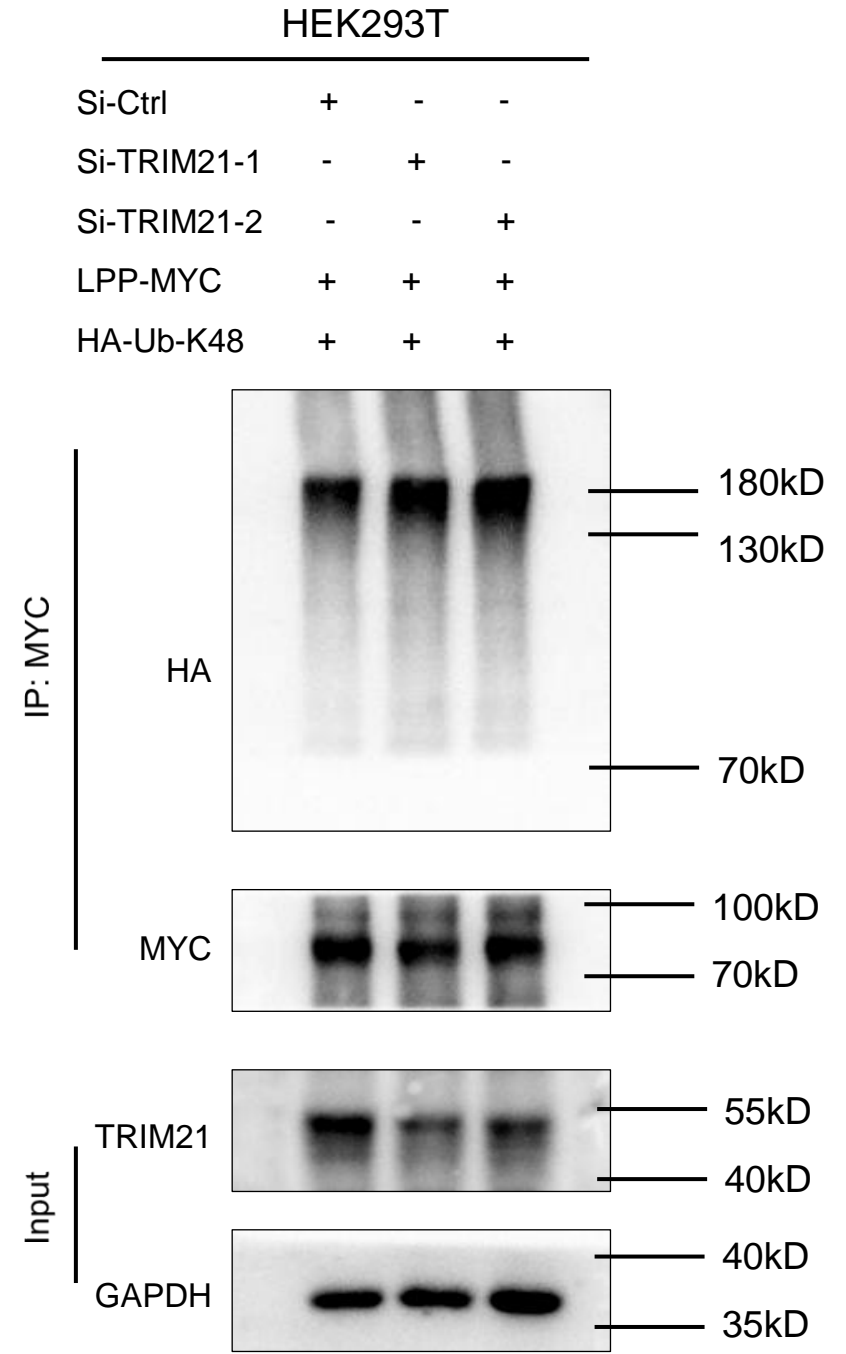

Figure S7C

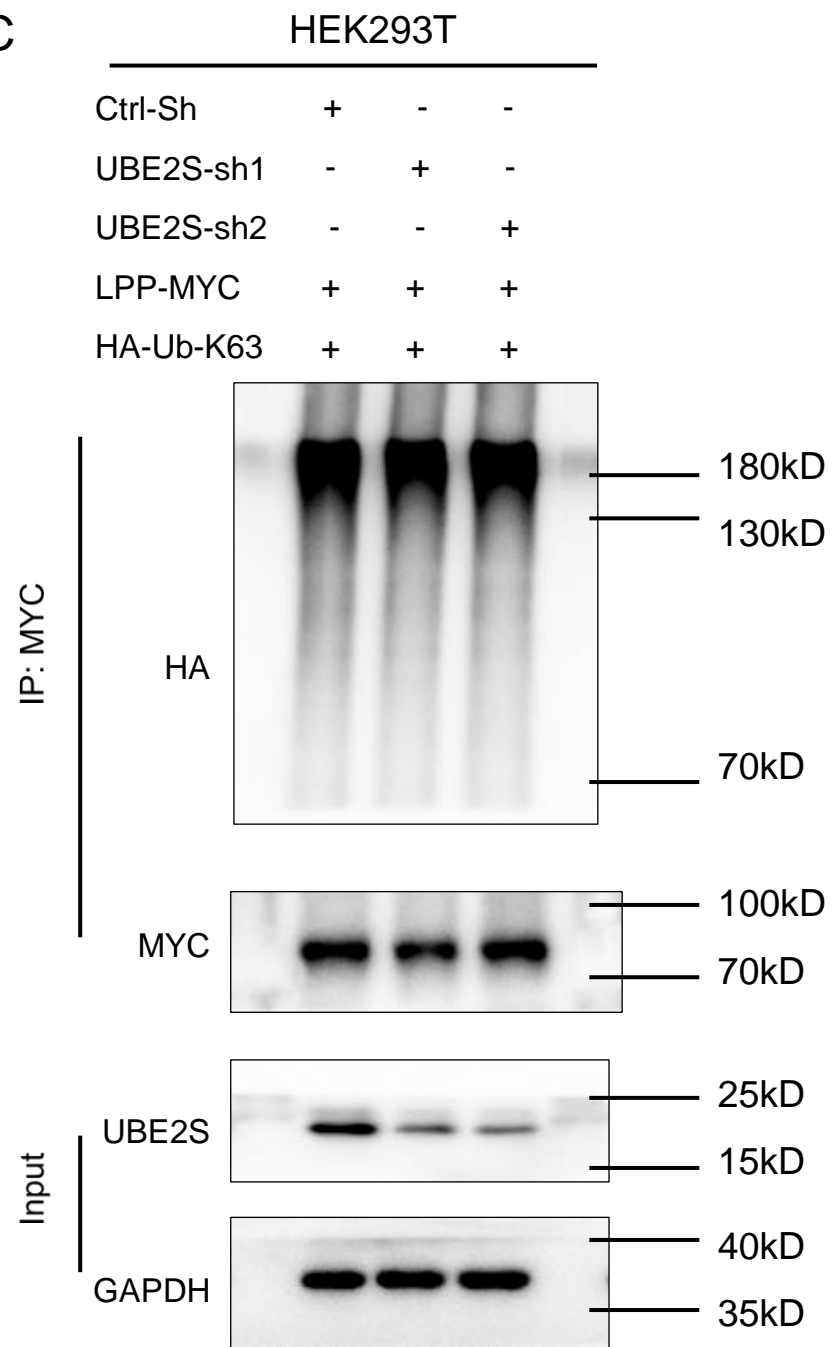

Figure S7D

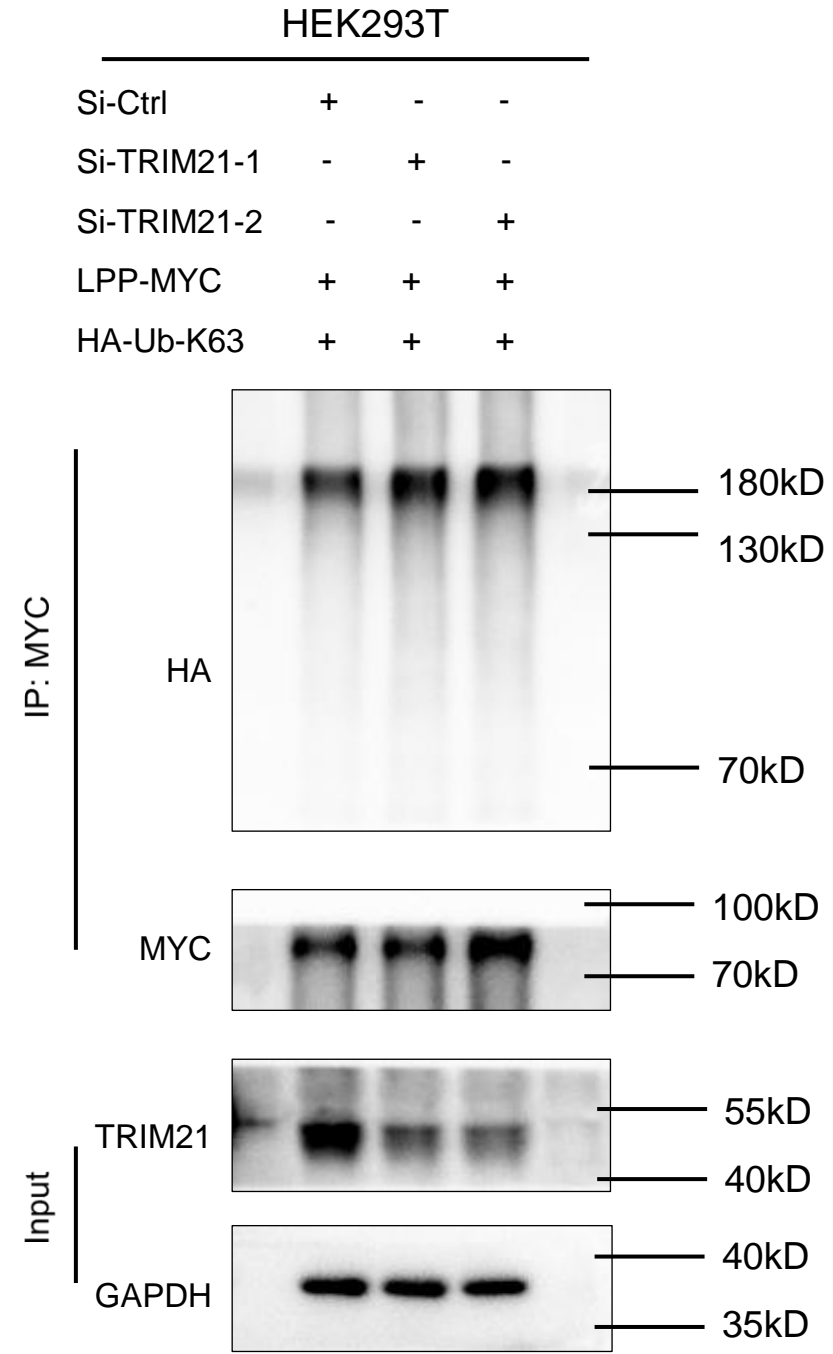

Figure S7E

HEK293T

|           |   |   |   |   |   |
|-----------|---|---|---|---|---|
| Vector    | - | + | + | - | - |
| UBE2S     | + | - | + | + | - |
| TRIM21    | + | - | - | + | + |
| LPP-MYC   | + | + | + | + | + |
| HA-Ub-K48 | + | + | + | + | + |
| IgG       | + | - | - | - | - |

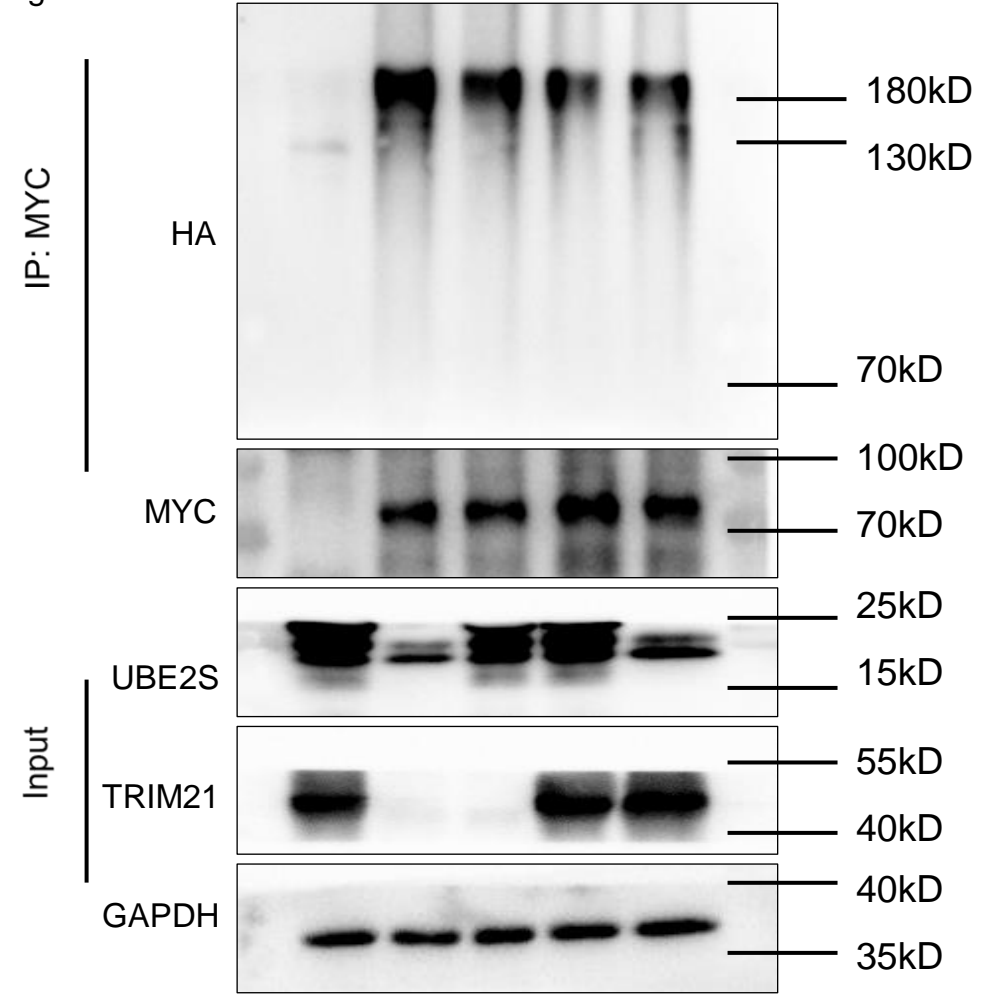

Figure S7F

HEK293T

|           |   |   |   |   |   |
|-----------|---|---|---|---|---|
| Vector    | - | + | + | - | - |
| UBE2S     | + | - | + | + | - |
| TRIM21    | + | - | - | + | + |
| LPP-MYC   | + | + | + | + | + |
| HA-Ub-K63 | + | + | + | + | + |
| IgG       | + | - | - | - | - |

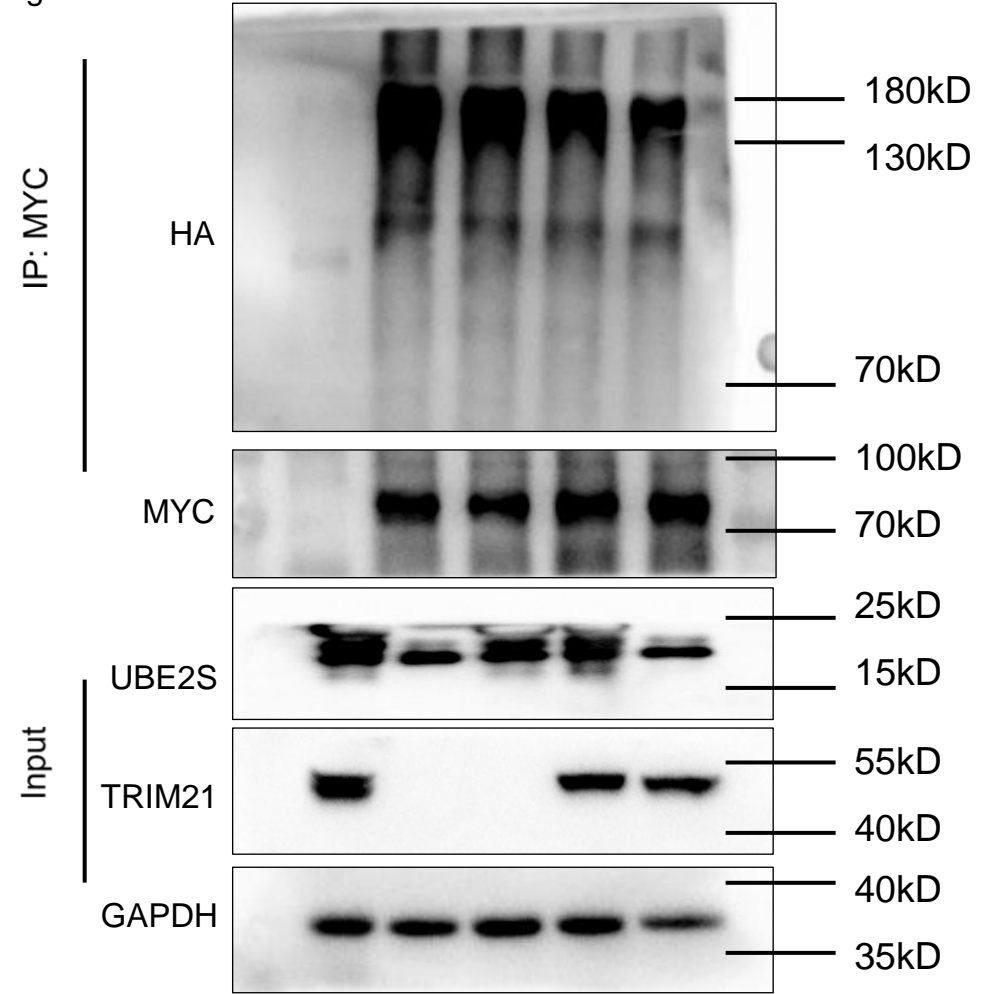

Supplement: 41419_2023_5938_MOESM3_ESM.pdf [file 41419_2023_5938_MOESM3_ESM.pdf]
